1 **Title:** Circulating polyunsaturated fatty acids and COVID-19: a prospective cohort study and  
2 Mendelian randomization analysis

3

4 *Yitang Sun<sup>1</sup>, Radhika Chatterjee<sup>1</sup>, Akash Ronanki<sup>1</sup>, Kaixiong Ye<sup>1,2,\*</sup>*

5

6 <sup>1</sup>Department of Genetics, Franklin College of Arts and Sciences, University of Georgia, Athens,  
7 GA, USA; and <sup>2</sup>Institute of Bioinformatics, University of Georgia, Athens, GA, USA

8

9 **\* Address for Correspondence:**

10

11 Dr. Kaixiong Ye

12 Department of Genetics

13 University of Georgia

14 C220 Davison Life Sciences

15 120 East Green Street, Athens, GA 30602

16 Office: 706-542-5898

17 Fax: 706-542-3910

18 Email: [Kaixiong.Ye@uga.edu](mailto:Kaixiong.Ye@uga.edu)

19 **ABSTRACT**

20 **Background:** Higher circulating polyunsaturated fatty acids (PUFAs), especially omega-3 ones,  
21 have been linked to a better prognosis in patients of coronavirus disease 2019 (COVID-19).  
22 However, the effects and causality of pre-infection PUFA levels remain unclear.

23 **Objective:** To investigate the observational and causal associations of circulating PUFAs with  
24 COVID-19 susceptibility and severity.

25 **Design:** We first performed a prospective cohort study in UK Biobank, with 20,626 controls who  
26 were tested negative and 4,101 COVID-19 patients, including 970 hospitalized ones. Plasma  
27 PUFAs at baseline were measured by nuclear magnetic resonance, including total PUFAs, omega-  
28 3 PUFAs, omega-6 PUFAs, docosahexaenoic acid (DHA), linoleic acid (LA), and the omega-  
29 6/omega-3 ratio. Moreover, bidirectional two-sample Mendelian randomization (MR) analyses  
30 were performed to examine the causal associations of eight individual PUFAs, measured in either  
31 plasma or red blood cells, with COVID-19 susceptibility and severity using summary statistics  
32 from existing genome-wide association studies.

33 **Results:** In the observational association analysis, total PUFAs, omega-3 PUFAs, omega-6 PUFAs,  
34 DHA, and LA were associated with a lower risk of severe COVID-19. Omega-3 PUFAs and DHA  
35 were also associated with a lower risk of testing positive for COVID-19. The omega-6/omega-3  
36 ratio was positively associated with risks of both susceptibility and severity. The forward MR  
37 analysis indicated that arachidonic acid (AA) and docosapentaenoic acid (DPA-n3) might be  
38 causally associated with a lower risk of severe COVID-19, with OR (95% CI) per one SD increase  
39 in the plasma level as 0.96 (0.94, 0.99) and 0.89 (0.81, 0.99), respectively. The reverse MR analysis  
40 did not support any causal effect of COVID-19 on PUFAs.

41 **Conclusions:** Our observational analysis supported that higher circulating PUFAs, either omega-  
42 3 or omega-6, are protective against severe COVID-19, while omega-3 PUFAs, especially DHA,  
43 were also associated with reducing COVID-19 susceptibility. Our MR analysis further supported  
44 causal associations of AA and DPA-n3 with a lower risk of severe COVID-19.

45

46 **Key Words:** COVID-19; polyunsaturated fatty acids; Mendelian randomization; prospective  
47 cohort; docosapentaenoic acid; arachidonic acid

## 48 **Introduction**

49 The coronavirus disease 2019 (COVID-19) pandemic, caused by the severe acute respiratory  
50 syndrome coronavirus 2 (SARS-CoV-2), has resulted in over five million deaths in less than two  
51 years (1, 2). Understanding the role of nutrition in moderating susceptibility to and progression of  
52 COVID-19 is critical for the development of evidence-based dietary recommendations to prevent  
53 infection and to manage disease progression (3, 4). Omega-3 and omega-6 polyunsaturated fatty  
54 acids (PUFAs) are of special interest because of their potent immunomodulatory effects, not only  
55 in mounting immune responses against viral infection but also in promoting inflammation  
56 resolution to avoid tissue damage (5-7). COVID-19 is an infectious disease characterized by  
57 cytokine storm and hyperinflammation in severe cases (8), presenting multiple possible points of  
58 action for PUFAs.

59  
60 Recent observational studies have noted significant changes in the circulating levels of various  
61 PUFAs when comparing COVID-19 patients to healthy controls and across severity subgroups of  
62 patients. In general, total PUFAs, omega-6 PUFAs, linoleic acid (LA), and the omega-3 index  
63 measured as the percentage of eicosapentaenoic acid (EPA) and docosahexaenoic acid (DHA) in  
64 red blood cell (RBC) fatty acids, are lower in COVID-19 patients and even lower in severe cases  
65 (9-12). A higher omega-3 index in patients was further associated with lower risks of requiring  
66 mechanical ventilation and death (9, 10). But conflicting patterns were also reported across cohorts  
67 and studies (11, 12), such as elevated levels of LA and arachidonic acid (AA) in COVID-19  
68 patients (12). Moreover, the circulating levels of PUFAs in patients are likely confounded by  
69 immune responses to the viral infection and do not represent the effects of pre-infection circulating  
70 levels. There is a prospective cohort study that compared hospitalized COVID-19 patients to non-

71 cases and found that almost all PUFA measurements, including total PUFAs, omega-6 PUFAs,  
72 omega-3 PUFAs, LA, and DHA, are associated with a lower risk of severe COVID-19. The only  
73 exception is the omega-6/omega-3 ratio, which exhibits a positive association (13). However, the  
74 study did not distinguish the effects on susceptibility and severity, and the usage of non-cases  
75 without COVID-19 status as the control did not correct for selection bias in those receiving tests.  
76 Altogether, while these observational studies provide valuable insights, they are susceptible to  
77 residual confounding and reverse causation. The causal effects of circulating PUFAs on COVID-  
78 19 susceptibility and severity remain unclear.

79  
80 Mendelian randomization (MR) is an analytic tool for inferring the causal effects of an exposure  
81 on an outcome of interest (14). MR uses randomly allocated genetic variants related to the exposure  
82 as instrumental variables, which are inborn and minimally affected by confounders and reverse  
83 causation (15). This method has been widely utilized in recent studies to evaluate the causal roles  
84 of specific risk factors in COVID-19, such as body mass index (BMI), white blood cells, some  
85 circulating proteins, and smoking (16-19). On the other hand, MR studies have also provided  
86 support for the causal clinical effects of circulating PUFAs (Supplemental Table 1). The  
87 genetically predicted circulating levels of various PUFAs have been associated with clinical  
88 biomarkers, such as blood lipids, white blood cell counts, and blood pressure (20-22). They were  
89 also directly associated with risks of specific diseases, such as cardiovascular diseases, diabetes,  
90 and cancers (23-27). Therefore, MR is a valuable and cost-effective tool to evaluate the causal  
91 roles of circulating PUFAs in COVID-19 susceptibility and severity.

92

93 In this study, we first performed an observational analysis in a prospective cohort, UK Biobank,  
94 with 4,101 COVID-19 patients, including 970 hospitalized ones, and 20,626 controls that were  
95 tested negative. We performed multiple comparisons across different case and control groups to  
96 evaluate the effects of six baseline plasma PUFA measures on COVID-19 susceptibility and  
97 severity. Furthermore, we applied bidirectional two-sample MR analyses to examine the causal  
98 associations between eight individual PUFAs and COVID-19. Genetic instruments for circulating  
99 PUFAs were obtained from previous genome-wide association studies (GWAS) of corresponding  
100 PUFAs measured in either plasma or RBC (28-30). Genetic associations with COVID-19  
101 susceptibility and severity were obtained from GWAS meta-analyses conducted by the COVID-  
102 19 Host Genetics Initiative (HGI) (31). Our study, integrating observational and genetics-  
103 instrumented MR analyses, unraveled the effects of total and individual circulating PUFAs on the  
104 risks of COVID-19 susceptibility and severity.

## 105 **Methods**

### 106 **Ethical considerations**

107 The usage of individual-level data for this study was approved by the University of Georgia  
108 Institutional Review Board and UK Biobank (application no. 48818). All participants of UK  
109 Biobank and the Framingham Heart Study (FHS) provided written informed consent before joining  
110 these studies. Informed consent was not required for publicly available summary statistics. Our  
111 study follows the guidelines for strengthening the reporting of observational studies in  
112 epidemiology (STROBE, Supplemental Table 2) and strengthening the reporting of Mendelian  
113 randomization studies (STROBE-MR, Supplemental Table 3) (32).

114

### 115 **Participants and study design**

116 We performed an observational cohort study based on UK Biobank and then a bidirectional two-  
117 sample MR study with summary statistics from GWAS of PUFAs and COVID-19. UK Biobank  
118 is a population-based prospective study, including >500,000 participants aged 37–73 years at  
119 recruitment from 2006 to 2010 in the United Kingdom (33). The observational analysis was  
120 performed to examine the associations between six plasma PUFA measures and COVID-19 status  
121 in UK Biobank. The six plasma PUFA measures include total PUFAs, omega-3 PUFAs, omega-6  
122 PUFAs, DHA, LA, and the calculated omega-6/omega-3 ratio. The MR study investigated the  
123 causal effects of eight individual PUFAs on COVID-19 susceptibility and severity. Genetic  
124 instruments for plasma PUFAs were obtained directly from published GWAS (28, 29). Genetic  
125 instruments for RBC PUFAs were determined based on a published GWAS, but their summary  
126 statistics, not reported in the original study, were calculated by ourselves with the same statistical  
127 model and individual-level data from 2,462 FHS participants (30). Six PUFAs have genetic

128 instruments for their circulating levels in both plasma and RBC, including  $\alpha$ -Linolenic acid (ALA),  
129 docosapentaenoic acid (DPA-n3), LA,  $\gamma$ -Linoleic acid (GLA), dihomo- $\gamma$ -linoleic acid (DGLA),  
130 and AA. Docosatetraenoic acid (DTA) only has genetic instruments for its RBC level, while DHA  
131 only for its plasma level.

132

### 133 **Observational analysis**

134 Figure 1 displays the flow of participants throughout the observational study. To minimize the  
135 possibility of bias due to population stratification, the analysis was restricted to individuals of  
136 European descent. In addition, we removed participants who had mismatched self-reported sex  
137 and genetic sex, sex chromosome aneuploidy, ten or more third-degree or closer relatives, or had  
138 withdrawn from UK Biobank. Our exposure variables were six PUFAs, as measured by nuclear  
139 magnetic resonance (NMR) in plasma samples collected between 2007 and 2010 (13, 33, 34). We  
140 used the COVID-19 testing result and inpatient status as our outcome (data accessed on June 21,  
141 2021). The specimen collection dates were March 16, 2020 to June 14, 2021 for those in England;  
142 February 11, 2020 to March 18, 2021 in Scotland; and January 13, 2020 to June 7, 2021 in Wales.  
143 Hospitalized COVID-19 patients were identified as those with positive PCR-based diagnosis and  
144 explicit evidence of being inpatients. Of note, being an inpatient does not necessarily indicate  
145 hospitalization for COVID-19 because patients in hospitals for any reason may be prioritized for  
146 COVID-19 testing (35). Inpatient status was not available for assessment centers in Scotland and  
147 Wales. To test the association with COVID-19 severity, we performed two separate analyses with  
148 different controls: 1) non-hospitalized COVID-19 patients, and 2) individuals who tested negative.  
149 To examine the association with COVID-19 susceptibility, we focused on all COVID-19 cases  
150 which were tested positive for SARS-CoV-2. Individuals with negative tests were used as the



151 control. This analysis of susceptibility was performed in two datasets: 1) participants from England,  
152 and 2) participants from England, Scotland, and Wales. For the 24,727 participants with both  
153 plasma PUFA measures and COVID-19 status, we applied logistic regression models on various  
154 case and control groups to estimate the associations of PUFAs with COVID-19 susceptibility and  
155 severity. Covariates included continuous variables, age, BMI, and Townsend deprivation index,  
156 and categorical variables, sex, ethnicity, and assessment center. Individuals with missing  
157 information in PUFA measures, COVID-19 status, or covariates were excluded. The comparable  
158 effect sizes were expressed per one standard deviation (SD) increase in the plasma PUFAs. All  
159 analyses in the observational study were conducted using R version 4.0.0, and nominal  
160 significance was set at  $p$ -value  $< 0.05$ . Bonferroni correction for multiple testing [corrected  $P$   
161 significance cutoff:  $0.05/2$  (outcomes)/ $6$  (exposures) =  $0.0042$ ] was used to avoid the type I error  
162 (36).

163

#### 164 **Genetic associations with PUFAs**

165 Two types of circulating PUFAs were evaluated in our MR analyses, plasma and RBC PUFAs.  
166 For plasma PUFAs, single nucleotide polymorphisms (SNPs) were obtained from published  
167 GWAS of omega-3 PUFAs ( $n = 8,866$ ) and omega-6 PUFAs ( $n = 8,631$ ) in participants of  
168 European ancestry (28, 29). We selected SNPs for each plasma omega-3 and omega-6 PUFA,  
169 which reached genome-wide significance level ( $P < 5 \times 10^{-8}$ ) and were restricted by linkage  
170 disequilibrium (LD) clumping to ensure independence ( $R^2 < 0.001$  within a 10 Mb window). To  
171 ensure robustness and reduce false positives, we also used less stringent LD cutoffs ( $R^2 < 0.01$ ,  
172 0.1, and 0.3) to select SNPs associated with plasma omega-3 PUFAs. The same LD-related  
173 sensitivity analysis was not possible for plasma omega-6 PUFAs because their genome-wide

174 summary statistics were not available. To examine the effects of RBC PUFAs, we obtained genetic  
175 associations at a genome-wide significance level ( $P < 5 \times 10^{-8}$ ) identified by Tintle *et al.* (30). We  
176 used the individual-level data from the FHS to confirm the significance of these SNPs and calculate  
177 their effect sizes and standard errors. In the same linear mixed model, covariates included age, sex,  
178 and matrix of kinship coefficients in the FHS. We respectively selected independent ( $R^2 < 0.001$ ,  
179 0.01, 0.1, and 0.3 within a 10 Mb window) SNPs predicting RBC PUFAs at genome-wide  
180 significance ( $P < 5 \times 10^{-8}$ ). We calculated  $F$ -statistics to test instrument strength ( $F$ -statistics  $> 10$   
181 for all plasma and RBC PUFAs) (37). Summary statistics for the genetic instruments for plasma  
182 and RBC PUFAs are openly available for public access (Supplemental Tables 4 and 5).

183

#### 184 **Genetic associations with COVID-19**

185 To assess genetic associations with COVID-19 severity, we used three GWAS meta-analyses  
186 conducted by the HGI (release 5, released on January 18, 2021) (31). First, we used the GWAS of  
187 severe COVID-19, labeled as study A2, that compared patients confirmed with very severe  
188 respiratory symptoms ( $n = 5,101$ ) to the control group of general population samples ( $n =$   
189  $1,383,241$ ). Second, another HGI GWAS, labeled as study B2, compared hospitalized COVID-19  
190 patients ( $n = 9,986$ ) to general population samples ( $n = 1,877,672$ ). The third severe COVID-19  
191 GWAS utilized in our study, labeled as B1, compared hospitalized COVID-19 patients ( $n = 4,829$ )  
192 to non-hospitalized COVID-19 patients ( $n = 11,816$ ). To assess genetic associations with COVID-  
193 19 susceptibility, we used one GWAS by HGI, labeled as study C2, that compared any COVID-  
194 19 case ( $n = 38,984$ ) to population controls ( $n = 1,644,784$ ). In addition to these four COVID-19  
195 GWAS used in our primary analysis, we repeated MR analyses using the study A2, B1, B2, and  
196 C2 from HGI release 4 (released on October 20, 2020), to examine the consistency of our findings

197 across different data releases. Detailed information about these GWAS is available at the COVID-  
198 19 HGI website (<https://www.covid19hg.org/results/>).

199  
200 To assess reverse causality, we obtained strong ( $P < 5 \times 10^{-8}$ ) and independent ( $R^2 < 0.001$  within  
201 a 10 Mb clumping window) SNPs associated with COVID-19 phenotypes as genetic instruments.  
202 We also used a less stringent selection criterion ( $P < 5 \times 10^{-6}$ ) to determine the robustness of our  
203 results.

204

### 205 **MR analyses**

206 MR was used to infer causality between PUFAs and COVID-19 by leveraging genetic data as  
207 instrumental variables. We scaled the odds ratio (OR) estimates per SD increment of plasma and  
208 RBC PUFAs (% of total fatty acids). We obtained the SNP-specific Wald estimate (ratio of the  
209 SNP-outcome effect divided by the SNP-exposure effect) when only one SNP was available. The  
210 inverse variance-weighted (IVW) method with a multiplicative random-effects model ( $\geq 2$  SNPs)  
211 was used as the primary analysis (38-40). We used the MR-Egger intercept test to evaluate the  
212 extent of unbalanced horizontal pleiotropy, which can lead to a biased causal effect estimate (39).  
213 In sensitivity analyses, we applied the MR-Egger and weighted median (WM) methods to account  
214 for pleiotropy (39-41). The MR-Egger method provides an unbiased causal estimate even when all  
215 SNPs are invalid instruments as long as that the horizontal pleiotropic effects are balanced across  
216 SNPs (39). However, MR-Egger can be imprecise and suffer from low statistical power,  
217 particularly when based on a small number of SNPs (e.g.,  $< 10$ ) (39). The WM method gives robust  
218 causal estimates even when up to 50% of SNPs are invalid genetic instruments (41). To test the  
219 presence of heterogeneity among genetic instruments, we calculated Cochran's Q statistic for the

220 IVW method and an extended version of Cochran's Q statistic (Rücker's Q') for the MR-Egger  
221 method (42, 43). We utilized Bonferroni correction [corrected  $P$  significance cutoff:  $0.05/2$   
222 (outcomes)/7 (exposures) = 0.0036] for multiple testing. Additionally, we required a relationship  
223 to be nominally significant ( $P < 0.05$ ) with both measures of the same PUFA (plasma and RBC)  
224 and in the case of COVID-19 severity, with different outcome GWAS (study A2, B2, and B1). All  
225 MR analyses were performed in R version 4.0.0 with the TwoSampleMR package version 3.6.9  
226 (44).

## 227 **Results**

### 228 **Baseline characteristics**

229 The flow of UK Biobank participants throughout the observational study is described in Figure 1,  
230 while their baseline characteristics are summarized in Table 1. Across all assessment centers in  
231 England, Scotland, and Wales, there were 104,112 participants with COVID-19 status. Among  
232 them, 17,395 were tested positive for COVID-19. Inpatient status was only reported by assessment  
233 centers in England. Of the 92,756 participants with COVID-19 status in England, 16,449 were  
234 tested positive, and 4,209 had confirmed inpatient status. Across England, Scotland, and Wales,  
235 COVID-19 patients were more likely to be male (t-test,  $P = 0.008$ ), with higher BMI ( $P = 9.34 \times$   
236  $10^{-14}$ ), but younger than participants with negative testing results ( $P < 2.2 \times 10^{-16}$ ). Across  
237 assessment centers in England, hospitalized COVID-19 patients were older ( $P < 2.2 \times 10^{-16}$ ), were  
238 more likely to be male ( $P = 2.44 \times 10^{-5}$ ), and had higher BMI ( $P = 1.13 \times 10^{-14}$ ), when compared  
239 to non-hospitalized COVID-19 patients.

240

### 241 **Observational association analysis**

242 Table 2 shows the observational associations between baseline plasma PUFAs and COVID-19  
243 susceptibility and severity. Among participants from England who also had plasma data, there  
244 were 18,293 with negative testing results and 3,873 with positive tests. Among the COVID-19  
245 patients, 970 were hospitalized and the other 2,903 were non-hospitalized. Comparing hospitalized  
246 patients to those tested negative, we observed a lower risk of COVID-19 severity per SD increase  
247 in total PUFAs (OR: 0.88; 95% confidence interval (CI): 0.82, 0.95;  $P = 0.0005$ ), omega-3 PUFAs  
248 (OR: 0.82; 95% CI: 0.76, 0.89;  $P = 8.1 \times 10^{-7}$ ), omega-6 PUFAs (OR: 0.91; 95% CI: 0.85, 0.98;  
249  $P = 0.0121$ ), DHA (OR: 0.78; 95% CI: 0.72, 0.85;  $P = 4.6 \times 10^{-9}$ ), and LA (OR: 0.92; 95% CI:

250 0.86, 0.99;  $P = 0.0228$ ). Using 2,903 non-hospitalized COVID-19 patients as the control group,  
251 there were consistently inverse associations of COVID-19 severity with total PUFAs ( $P = 0.0012$ ),  
252 omega-3 PUFAs ( $P = 0.0013$ ), omega-6 PUFAs ( $P = 0.0047$ ), DHA ( $P = 8.9 \times 10^{-5}$ ), and LA ( $P$   
253  $= 0.0079$ ).

254

255 We further evaluated the effects of baseline plasma PUFAs on COVID-19 susceptibility by  
256 comparing COVID-19 patients to those tested negative. Among 24,727 participants in England,  
257 Scotland, and Wales, we found a lower risk of getting COVID-19 per SD increase in omega-3  
258 PUFAs (OR: 0.92; 95% CI: 0.89, 0.96;  $P = 2.3 \times 10^{-5}$ ) and DHA (OR: 0.91; 95% CI: 0.87, 0.94;  
259  $P = 1.4 \times 10^{-6}$ ). Among 22,166 individuals in England only, we also observed consistently  
260 significant associations for omega-3 PUFAs (OR: 0.92; 95% CI: 0.88, 0.96;  $P = 4.3 \times 10^{-5}$ ) and  
261 DHA (OR: 0.91; 95% CI: 0.87, 0.94;  $P = 3.0 \times 10^{-6}$ ).

262

263 The omega-6/omega-3 ratio was significantly associated with an increased risk of severe COVID-  
264 19, either by comparing hospitalized patients to participants who tested negative (OR: 1.13; 95%  
265 CI: 1.07, 1.20;  $P = 1.5 \times 10^{-5}$ ) or to non-hospitalized patients (OR: 1.12; 95% CI: 1.03, 1.22;  $P =$   
266  $0.0061$ ). The ratio was also positively associated with COVID-19 susceptibility when comparing  
267 COVID-19 patients to those tested negative in England, Scotland, and Wales (OR: 1.06; 95% CI:  
268 1.03, 1.10;  $P = 0.0005$ ) or in England only (OR: 1.05; 95% CI: 1.02, 1.09;  $P = 0.0030$ ). Overall,  
269 our observational analysis showed that individuals with lower baseline levels of all five examined  
270 PUFAs were associated with a higher risk of hospitalized COVID-19, and those with lower levels  
271 of omega-3 PUFAs and DHA were also at a higher risk of COVID-19 susceptibility. On the other

272 hand, the omega-6/omega-3 ratio was positively associated with the risks of both COVID-19  
273 susceptibility and severity.

274

### 275 **Bidirectional MR analyses**

276 We performed bidirectional MR analyses to examine the causal relationships between individual  
277 PUFAs and COVID-19. First, we performed a forward MR analysis to investigate the effects of  
278 PUFAs on COVID-19 susceptibility and severity. Second, we conducted a reverse MR analysis to  
279 evaluate the causal effects of genetically instrumented COVID-19 on PUFAs. All genetic  
280 instruments for PUFAs ( $F$ -statistics  $>31.43$ ) and COVID-19 ( $F$ -statistics  $>30.81$ ) were strong  
281 instruments. Six individual PUFAs have existing GWAS for their levels in plasma and RBC, and  
282 there are three GWAS on severe COVID-19 (i.e., HGI study A2, B2, B1). Only results that were  
283 consistent across these different GWAS were reported here.

284

285 In the forward MR study of plasma PUFAs, genetically instrumented one-SD increase in AA (OR:  
286 0.96; 95% CI: 0.94, 0.99;  $P = 0.007$ ) and DPA-n3 (OR: 0.89; 95% CI: 0.81, 0.99;  $P = 0.026$ ) were  
287 associated with a lower risk of very severe respiratory symptoms of COVID-19 based on HGI  
288 study A2 (Figure 2A). Consistently, genetically instrumented AA (OR: 0.96; 95% CI: 0.96, 0.97;  
289  $P = 3.23 \times 10^{-20}$ ) and DPA-n3 (OR: 0.93; 95% CI: 0.92, 0.95;  $P = 4.73 \times 10^{-20}$ ) were associated  
290 with a lower risk of hospitalized COVID-19 based on HGI study B2, which used general  
291 population samples as the control (Figure 2B). Similar results were observed with HGI study B1,  
292 which used non-hospitalized COVID-19 patients as the control (Figure 2C). Besides plasma  
293 PUFAs, MR analyses with RBC PUFAs consistently support the protective effects of AA against  
294 severe COVID-19 based on HGI A2 (OR: 0.97; 95% CI: 0.94, 1.00;  $P = 0.048$ ), B2 (OR: 0.95;

295 95% CI: 0.93, 0.97;  $P = 1.32 \times 10^{-5}$ ), and B1 (OR: 0.84; 95% CI: 0.83, 0.85;  $P = 8.57 \times 10^{-130}$ )  
296 studies (Figures 2). For DPA-n3, its genetically instrumented RBC level was consistently  
297 associated with a lower risk of COVID-19 severity in our forward MR analysis with study A2 (OR:  
298 0.79; 95% CI: 0.63, 0.99;  $P = 0.041$ ), B2 (OR: 0.88; 95% CI: 0.82, 0.94;  $P = 9.30 \times 10^{-5}$ ), and B1  
299 (OR: 0.76; 95% CI: 0.59, 0.98;  $P = 0.036$ ) (Figures 2). To ensure the robustness of findings, we  
300 selected genetic instruments based on various LD categories ( $R^2 < 0.001, 0.01, 0.1, \text{ and } 0.3$ ). The  
301 causal estimates of AA and DPA-n3 were consistent and at least nominally significant throughout  
302 all MR analyses (Supplemental Tables 6–8). Causal estimates for AA and DPA-n3 maintained the  
303 same effect directions in MR-Egger and WM methods, and sensitivity tests identified no evidence  
304 of horizontal pleiotropy or heterogeneity of effects (Supplemental Tables 6–8). Of note, while  
305 there were nominally significant associations between plasma DHA and very severe COVID-19  
306 with HGI A2 and between RBC DTA and hospitalized COVID-19 with HGI B1, these two  
307 relationships were not replicated in analyses with the other two GWAS of severe COVID-19  
308 (Figure 2).

309  
310 In terms of COVID-19 susceptibility, we found that genetically instrumented one-SD increase of  
311 plasma DGLA (OR: 1.01; 95% CI: 1.00, 1.02;  $P = 0.031$ ) was associated with an increased risk of  
312 any SARS-CoV-2 infection (Figure 3). MR analysis with RBC DGLA showed a similar pattern  
313 (OR: 1.01; 95% CI: 1.00, 1.02;  $P = 0.007$ ). However, the association of genetically instrumented  
314 DGLA with the risk of testing positive for COVID-19 was not statistically significant using any  
315 other LD criteria for genetic instruments (Supplemental Table 9). Notably, our forward MR  
316 findings were confirmed using additional COVID-19 GWAS from HGI release 4 (Supplemental



317 Tables 10–13). In summary, our forward MR analyses suggest that higher circulating levels of AA  
318 and DPA-n3 are associated with a lower risk of developing severe forms of COVID-19.

319  
320 We further applied reverse MR analyses to investigate the causal effects of COVID-19 on each  
321 PUFA. Although several reverse MR analyses showed that genetically instrumented COVID-19  
322 susceptibility or severity was associated with ALA, DHA, GLA, or DGLA, there was no consistent  
323 evidence for an effect of COVID-19 on these PUFAs using the conventional genome-wide  
324 significance threshold ( $P < 5 \times 10^{-8}$ ) and the more lenient threshold ( $P < 5 \times 10^{-6}$ ) for COVID-19  
325 SNPs from HGI release 5 (Supplemental Tables 14–21). In addition, we used SNPs associated  
326 with COVID-19 from HGI release 4, and we did not observe any causal effect of COVID-19 on  
327 PUFAs (Supplemental Tables 22–29). Importantly, the reverse MR results showed no significant  
328 association of genetically predicted COVID-19 severity with AA and DPA-n3, suggesting that the  
329 significant forward MR results are unlikely to be confounded by reverse causation.

## 330 **Discussion**

331 Our observational analysis in a prospective cohort showed that total PUFAs, omega-3 PUFAs,  
332 omega-6 PUFAs, DHA, and LA in baseline plasma samples were inversely associated with the  
333 risk of severe COVID-19. There were also inverse associations of omega-3 PUFAs and DHA with  
334 COVID-19 susceptibility. In contrast, the omega-6/omega-3 ratio was positively associated with  
335 both COVID-19 susceptibility and severity. In our bidirectional two-sample MR analyses, we  
336 provided evidence for the potential causal roles of higher circulating AA and DPA-n3 in a lower  
337 risk of COVID-19 severity.

338

339 Our observational findings are broadly consistent with previous observational studies and a pilot  
340 clinical trial. Julkunen *et al.* also examined the UK Biobank cohort, although with smaller sample  
341 sizes and different controls. They showed that for total PUFAs, omega-3 PUFAs, omega-6 PUFAs,  
342 DHA, and LA, their absolute levels and relative percentages in total fatty acids were both inversely  
343 associated with the risk of severe COVID-19 when comparing patients to non-cases with unknown  
344 COVID-19 status (13). Our study corrected for potential selection bias by restricting the analysis  
345 to individuals with COVID-19 testing status and used those with negative tests or non-hospitalized  
346 patients as the controls. We confirmed the same inverse association patterns for severe COVID-  
347 19. We further showed that omega-3 PUFAs and DHA were inversely associated with COVID-19  
348 susceptibility. Another study investigated the metabolic fingerprint of COVID-19 severity in 581  
349 samples from three cohorts, revealing inverse associations with severity for total PUFAs, omega-  
350 6 PUFAs, and LA. But inconsistent associations of omega-3 PUFAs, DHA, and the omega-  
351 6/omega-3 ratio were also observed across cohorts (11). Comparing the lipid profile of 42 severe  
352 COVID-19 patients to 22 healthy subjects, a study by Perez-Torres *et al.* found that plasma GLA,

353 DGLA, and EPA were decreased in COVID-19 patients, but LA and AA were elevated (12). Two  
354 small studies found that the omega-3 index was significantly lower in COVID-19 patients and was  
355 inversely associated with risks of requiring mechanical ventilation and death (9, 10). The  
356 differences in these observational studies are likely results of uncontrolled confounding factors or  
357 the usage of patients at different disease stages. In support of the associated protective effect of  
358 omega-3 fatty acids, the first randomized clinical trial of supplementing 1000 mg omega-3 fatty  
359 acids in 128 critically ill COVID-19 patients showed that the intervention group has a significantly  
360 higher one-month survival rate and improved respiratory and renal function (45). Altogether with  
361 the existing literature, our study supports the protective effects of omega-3 fatty acids against the  
362 development of severe COVID-19 and likely also against viral infection. There are probably  
363 protective benefits of omega-6 fatty acids against severe COVID-19, but a high omega-6/omega-  
364 3 ratio may increase the risks of both COVID-19 susceptibility and severity.

365  
366 In our MR study, we examined whether specific individual PUFAs play causal roles in COVID-  
367 19 susceptibility and severity. We found that genetically instrumented circulating levels of AA  
368 and DPA-n3 are associated with a lower risk of severe COVID-19. AA is an omega-6 fatty acid,  
369 while DPA-n3 is an omega-3 fatty acid. Although these two specific PUFAs were not available in  
370 our observational analysis, their potentially causal protective effects are consistent with the inverse  
371 associations of both omega-6 PUFAs and omega-3 PUFAs with severe COVID-19. The potential  
372 protective roles of AA and DPA-n3 in severe COVID-19 have mechanistic support. Both of them  
373 are well-known to serve as precursors of specialized pro-resolving mediators, such as lipoxins  
374 derived from AA, resolvins, protectins and maresins derived from DPA-n3, playing essential roles  
375 in promoting the resolution of inflammatory responses and tissue repair (5, 7, 46). Notably, it has

376 been highlighted that the roles of AA in initiating timely inflammatory responses through its  
377 derived prostaglandins (PGs), such as PGE<sub>2</sub>, may be as important as its roles in inflammatory  
378 resolution through lipoxins (6, 47). Another possible mechanistic route for AA could be drawn  
379 from a human cell line study (48). Huh-7 cells, a hepatocyte-derived carcinoma cell line, when  
380 infected with human coronavirus 229E (HCoV-229E), exhibit significantly elevated levels of LA  
381 and AA, a pattern also observed in a study of severe COVID-19 patients (12). Interestingly,  
382 exogenous supplementation of LA and AA in HCoV-229E-infected cells significantly suppressed  
383 HCoV-229E virus replication. Similar suppressive effects were observed for the highly pathogenic  
384 Middle East respiratory syndrome coronavirus (MERS-CoV) (48), suggesting a possible general  
385 mechanism of LA and AA on coronavirus. Additionally, LA has been shown to directly and tightly  
386 bind the SARS-CoV-2 spike glycoprotein, reducing its interaction with the human ACE2 receptor  
387 (49). Similar inhibitory effects were observed for ALA, EPA, and DHA in a ligand screening study  
388 (50), which did not include AA and DPA-n3. Our MR findings call for future studies into the  
389 mechanistic roles of AA and DPA-n3 in the development of severe COVID-19.

390  
391 Our study has a number of strengths and novel features. To our knowledge, this is the first MR  
392 study examining the causal effects of PUFAs on COVID-19. It is also the first MR study of PUFAs  
393 that used genetic variants for RBC PUFAs, in addition to plasma PUFAs. We applied bidirectional  
394 two-sample MR analyses to evaluate the direction of the causality and to rule out the impacts of  
395 reverse causation. To obtain robust evidence, we required the reported patterns to be observed with  
396 both plasma and RBC PUFAs. Similarly, to ensure reproducibility across data releases, we  
397 confirmed the results with analyses based on four COVID-19 GWAS (A2, B2, B1, and C2) from  
398 HGI releases 5 and 4. Bonferroni correction was used to overcome the issue of multiple testing.

399 Another strength is the sensitivity analysis with various LD cutoffs. Additionally, comparing our  
400 MR results between severe COVID-19 and any SARS-CoV-2 infection, we found that AA and  
401 DPA-n3 might mainly impact the severity of disease progression but not susceptibility to viral  
402 infection.

403  
404 Our study has several limitations. First, we could not completely rule out the possibility that some  
405 genetic variants might be pleiotropic, although we applied multiple sensitivity analyses, including  
406 the heterogeneity test, MR-Egger, and WM method. Second, a limitation of this MR study is that  
407 the effect of endogenous PUFAs may be different from the effect of dietary PUFAs, and our study  
408 did not directly examine dietary PUFAs. However, leveraging genetic instruments yields novel  
409 insights and minimizes the measurement error from self-reported dietary consumption in nutrition  
410 studies. Third, another limitation is that the population controls were utilized with no information  
411 on COVID-19 status in three COVID-19 GWAS used in our primary analysis, including the HGI  
412 A2, B2, and C2 studies. To mitigate this issue, we also utilized the HGI B1 study, which is another  
413 GWAS of COVID-19 using non-hospitalized patients as the control group. Fourth, in the  
414 observational study, UK Biobank recruited healthier individuals and thus may not be  
415 representative of the general population. Fifth, the NMR-based measurements of plasma PUFAs  
416 were collected over ten years before the COVID-19 pandemic, and the time lag likely attenuates  
417 the magnitude of association. Sixth, our observational study could be affected by ascertainment  
418 bias in differential healthcare seeking and testing. Seventh, our findings might not be extrapolated  
419 to other ethnicities because the study only focused on participants of European descent. Eighth,  
420 our study can not thoroughly explain the mechanisms. Further mechanistic research is necessary  
421 to investigate the biological pathways underpinning the roles of PUFAs in severe COVID-19.

422

423 In conclusion, our observational analysis in a prospective cohort shows that total PUFAs, omega-  
424 3 PUFAs, omega-6 PUFAs, DHA, and LA are inversely associated with the risk of severe COVID-  
425 19. Omega-3 and DHA may also be protective against SARS-CoV-2. A higher omega-6/omega-3  
426 ratio has adverse effects on both COVID-19 susceptibility and severity. Our MR study further  
427 suggests a possible causal role of AA and DPA-n3 in reducing the risk of severe COVID-19. Our  
428 findings call for further studies into the mechanistic roles of PUFAs in COVID-19. They also  
429 support the possible usage of circulating PUFA levels as biomarkers for identifying high-risk  
430 individuals and as therapeutic targets for managing COVID-19 patients.

## 431 References

- 432 1. Zhu N, Zhang D, Wang W, Li X, Yang B, Song J, Zhao X, Huang B, Shi W, Lu R, et al.  
433 A Novel Coronavirus from Patients with Pneumonia in China, 2019. *N Engl J Med*  
434 2020;382(8):727-33. doi: 10.1056/NEJMoa2001017.
- 435 2. World Health Organization. Coronavirus disease 2019 (COVID-19) report. 2021.
- 436 3. James PT, Ali Z, Armitage AE, Bonell A, Cerami C, Drakesmith H, Jobe M, Jones KS,  
437 Liew Z, Moore SE, et al. The Role of Nutrition in COVID-19 Susceptibility and Severity of  
438 Disease: A Systematic Review. *J Nutr* 2021;151(7):1854-78. doi: 10.1093/jn/nxab059.
- 439 4. Akhtar S, Das JK, Ismail T, Wahid M, Saeed W, Bhutta ZA. Nutritional perspectives for  
440 the prevention and mitigation of COVID-19. *Nutr Rev* 2021;79(3):289-300. doi:  
441 10.1093/nutrit/nuaa063.
- 442 5. Torrinhas RS, Calder PC, Lemos GO, Waitzberg DL. Parenteral fish oil: An adjuvant  
443 pharmacotherapy for coronavirus disease 2019? *Nutrition* 2021;81:110900. doi:  
444 10.1016/j.nut.2020.110900.
- 445 6. Das UN. Essential fatty acids and their metabolites in the pathobiology of (coronavirus  
446 disease 2019) COVID-19. *Nutrition* 2021;82:111052. doi: 10.1016/j.nut.2020.111052.
- 447 7. Kothapalli KSD, Park HG, Brenna JT. Polyunsaturated fatty acid biosynthesis pathway  
448 and genetics. implications for interindividual variability in prothrombotic, inflammatory  
449 conditions such as COVID-19(,, bigstar, bigstar bigstar). *Prostaglandins Leukot Essent Fatty*  
450 *Acids* 2020;162:102183. doi: 10.1016/j.plefa.2020.102183.
- 451 8. Mangalmurti N, Hunter CA. Cytokine Storms: Understanding COVID-19. *Immunity*  
452 2020;53(1):19-25. doi: 10.1016/j.immuni.2020.06.017.
- 453 9. Zapata BR, Muller JM, Vasquez JE, Ravera F, Lago G, Canon E, Castaneda D, Pradenas  
454 M, Ramirez-Santana M. Omega-3 Index and Clinical Outcomes of Severe COVID-19:  
455 Preliminary Results of a Cross-Sectional Study. *Int J Environ Res Public Health* 2021;18(15).  
456 doi: 10.3390/ijerph18157722.
- 457 10. Asher A, Tintle NL, Myers M, Lockshon L, Bacareza H, Harris WS. Blood omega-3 fatty  
458 acids and death from COVID-19: A pilot study. *Prostaglandins Leukot Essent Fatty Acids*  
459 2021;166:102250. doi: 10.1016/j.plefa.2021.102250.
- 460 11. Dierckx T, van Elslande J, Salmela H, Decru B, Wauters E, Gunst J, Van Herck Y,  
461 CONTAGIOUS-consortium t, Wauters J, Stessel B, et al. The metabolic fingerprint of COVID-  
462 19 severity. 2020:2020.11.09.20228221. doi: 10.1101/2020.11.09.20228221 %J medRxiv.
- 463 12. Perez-Torres I, Guarner-Lans V, Soria-Castro E, Manzano-Pech L, Palacios-Chavarria A,  
464 Valdez-Vazquez RR, Dominguez-Cherit JG, Herrera-Bello H, Castillejos-Suastegui H, Moreno-  
465 Castaneda L, et al. Alteration in the Lipid Profile and the Desaturases Activity in Patients With  
466 Severe Pneumonia by SARS-CoV-2. *Front Physiol* 2021;12:667024. doi:  
467 10.3389/fphys.2021.667024.
- 468 13. Julkunen H, Cichonska A, Slagboom PE, Wurtz P, Nightingale Health UKBI. Metabolic  
469 biomarker profiling for identification of susceptibility to severe pneumonia and COVID-19 in the  
470 general population. *Elife* 2021;10. doi: 10.7554/eLife.63033.
- 471 14. Smith GD, Ebrahim S. 'Mendelian randomization': can genetic epidemiology contribute  
472 to understanding environmental determinants of disease? *Int J Epidemiol* 2003;32(1):1-22. doi:  
473 10.1093/ije/dyg070.
- 474 15. Burgess S, Butterworth A, Malarstig A, Thompson SG. Use of Mendelian randomisation  
475 to assess potential benefit of clinical intervention. *BMJ* 2012;345:e7325. doi:  
476 10.1136/bmj.e7325.

- 477 16. Ponsford MJ, Gkatzionis A, Walker VM, Grant AJ, Wootton RE, Moore LSP, Fatumo S,  
478 Mason AM, Zuber V, Willer C, et al. Cardiometabolic Traits, Sepsis, and Severe COVID-19: A  
479 Mendelian Randomization Investigation. *Circulation* 2020;142(18):1791-3. doi:  
480 10.1161/CIRCULATIONAHA.120.050753.
- 481 17. Sun Y, Zhou J, Ye K. White Blood Cells and Severe COVID-19: A Mendelian  
482 Randomization Study. *J Pers Med* 2021;11(3). doi: 10.3390/jpm11030195.
- 483 18. Sun Y, Zhou J, Ye K. Extensive Mendelian randomization study identifies potential  
484 causal risk factors for severe COVID-19. *Communications Medicine* 2021. doi: 10.1038/s43856-  
485 021-00061-9.
- 486 19. Li S, Hua X. Modifiable lifestyle factors and severe COVID-19 risk: a Mendelian  
487 randomisation study. *BMC Med Genomics* 2021;14(1):38. doi: 10.1186/s12920-021-00887-1.
- 488 20. Yuan T, Si S, Li Y, Li W, Chen X, Liu C, Li J, Wang B, Hou L, Liu Y, et al. Roles for  
489 circulating polyunsaturated fatty acids in ischemic stroke and modifiable factors: a Mendelian  
490 randomization study. *Nutr J* 2020;19(1):70. doi: 10.1186/s12937-020-00582-4.
- 491 21. Zhao JV, Schooling CM. The role of linoleic acid in asthma and inflammatory markers: a  
492 Mendelian randomization study. *Am J Clin Nutr* 2019;110(3):685-90. doi: 10.1093/ajcn/nqz130.
- 493 22. Ma M, Yang F, Wang Z, Bao Q, Shen J, Xie X. Association of plasma polyunsaturated  
494 fatty acids with arterial blood pressure: A Mendelian randomization study. *Medicine (Baltimore)*  
495 2021;100(3):e24359. doi: 10.1097/MD.00000000000024359.
- 496 23. Zhang T, Zhao JV, Schooling CM. The associations of plasma phospholipid arachidonic  
497 acid with cardiovascular diseases: A Mendelian randomization study. *EBioMedicine*  
498 2021;63:103189. doi: 10.1016/j.ebiom.2020.103189.
- 499 24. Park S, Lee S, Kim Y, Lee Y, Kang M, Kim K, Kim Y, Han S, Lee H, Lee J, et al. Causal  
500 Effects of Serum Levels of n-3 or n-6 Polyunsaturated Fatty Acids on Coronary Artery Disease:  
501 Mendelian Randomization Study. *Nutrients* 2021;13(5). doi: 10.3390/nu13051490.
- 502 25. Liao LZ, Li WD, Liu Y, Li JP, Zhuang XD, Liao XX. Exploring the causal pathway from  
503 omega-6 levels to coronary heart disease: A network Mendelian randomization study. *Nutr*  
504 *Metab Cardiovasc Dis* 2020;30(2):233-40. doi: 10.1016/j.numecd.2019.09.013.
- 505 26. Zhao JV, Schooling CM. Effect of linoleic acid on ischemic heart disease and its risk  
506 factors: a Mendelian randomization study. *BMC Med* 2019;17(1):61. doi: 10.1186/s12916-019-  
507 1293-x.
- 508 27. Liyanage UE, Ong JS, An J, Gharahkhani P, Law MH, MacGregor S. Mendelian  
509 Randomization Study for Genetically Predicted Polyunsaturated Fatty Acids Levels on Overall  
510 Cancer Risk and Mortality. *Cancer Epidemiol Biomarkers Prev* 2019;28(6):1015-23. doi:  
511 10.1158/1055-9965.EPI-18-0940.
- 512 28. Lemaitre RN, Tanaka T, Tang W, Manichaikul A, Foy M, Kabagambe EK, Nettleton JA,  
513 King IB, Weng LC, Bhattacharya S, et al. Genetic loci associated with plasma phospholipid n-3  
514 fatty acids: a meta-analysis of genome-wide association studies from the CHARGE Consortium.  
515 *PLoS Genet* 2011;7(7):e1002193. doi: 10.1371/journal.pgen.1002193.
- 516 29. Guan W, Steffen BT, Lemaitre RN, Wu JHY, Tanaka T, Manichaikul A, Foy M, Rich  
517 SS, Wang L, Nettleton JA, et al. Genome-wide association study of plasma N6 polyunsaturated  
518 fatty acids within the cohorts for heart and aging research in genomic epidemiology consortium.  
519 *Circ Cardiovasc Genet* 2014;7(3):321-31. doi: 10.1161/CIRCGENETICS.113.000208.
- 520 30. Tintle NL, Pottala JV, Lacey S, Ramachandran V, Westra J, Rogers A, Clark J, Olthoff  
521 B, Larson M, Harris W, et al. A genome-wide association study of saturated, mono- and



- 522 polyunsaturated red blood cell fatty acids in the Framingham Heart Offspring Study.  
523 Prostaglandins Leukot Essent Fatty Acids 2015;94:65-72. doi: 10.1016/j.plefa.2014.11.007.
- 524 31. The COVID-10 Host Genetics Initiative. Mapping the human genetic architecture of  
525 COVID-19. Nature 2021. doi: 10.1038/s41586-021-03767-x.
- 526 32. Davey Smith G, Davies N, Dimou N, Egger M, Gallo V, Golub R, Higgins J, Langenberg  
527 C, Loder E, Richards J, et al. STROBE-MR: Guidelines for strengthening the reporting of  
528 Mendelian randomization studies. PeerJ Preprints 2019;7:e27857v1. doi:  
529 10.7287/peerj.preprints.27857v1.
- 530 33. Sudlow C, Gallacher J, Allen N, Beral V, Burton P, Danesh J, Downey P, Elliott P, Green  
531 J, Landray M, et al. UK biobank: an open access resource for identifying the causes of a wide  
532 range of complex diseases of middle and old age. PLoS Med 2015;12(3):e1001779. doi:  
533 10.1371/journal.pmed.1001779.
- 534 34. Wurtz P, Kangas AJ, Soininen P, Lawlor DA, Davey Smith G, Ala-Korpela M.  
535 Quantitative Serum Nuclear Magnetic Resonance Metabolomics in Large-Scale Epidemiology:  
536 A Primer on -Omic Technologies. Am J Epidemiol 2017;186(9):1084-96. doi:  
537 10.1093/aje/kwx016.
- 538 35. Armstrong J, Rudkin JK, Allen N, Crook DW, Wilson DJ, Wyllie DH, O'Connell AM.  
539 Dynamic linkage of COVID-19 test results between Public Health England's Second Generation  
540 Surveillance System and UK Biobank. Microb Genom 2020;6(7). doi: 10.1099/mgen.0.000397.
- 541 36. Armstrong RA. When to use the Bonferroni correction. Ophthalmic Physiol Opt  
542 2014;34(5):502-8. doi: 10.1111/opo.12131.
- 543 37. Burgess S, Thompson SG, Collaboration CCG. Avoiding bias from weak instruments in  
544 Mendelian randomization studies. Int J Epidemiol 2011;40(3):755-64. doi: 10.1093/ije/dyr036.
- 545 38. Burgess S, Butterworth A, Thompson SG. Mendelian randomization analysis with  
546 multiple genetic variants using summarized data. Genet Epidemiol 2013;37(7):658-65. doi:  
547 10.1002/gepi.21758.
- 548 39. Bowden J, Davey Smith G, Burgess S. Mendelian randomization with invalid  
549 instruments: effect estimation and bias detection through Egger regression. Int J Epidemiol  
550 2015;44(2):512-25. doi: 10.1093/ije/dyv080.
- 551 40. Burgess S, Davey Smith G, Davies N, Dudbridge F, Gill D, Glymour M, Hartwig F,  
552 Holmes M, Minelli C, Relton C, et al. Guidelines for performing Mendelian randomization  
553 investigations [version 2; peer review: 1 approved, 1 approved with reservations]. Wellcome  
554 Open Research 2020;4(186). doi: 10.12688/wellcomeopenres.15555.2.
- 555 41. Bowden J, Davey Smith G, Haycock PC, Burgess S. Consistent Estimation in Mendelian  
556 Randomization with Some Invalid Instruments Using a Weighted Median Estimator. Genet  
557 Epidemiol 2016;40(4):304-14. doi: 10.1002/gepi.21965.
- 558 42. Greco MF, Minelli C, Sheehan NA, Thompson JR. Detecting pleiotropy in Mendelian  
559 randomisation studies with summary data and a continuous outcome. Stat Med  
560 2015;34(21):2926-40. doi: 10.1002/sim.6522.
- 561 43. Bowden J, Spiller W, Del Greco MF, Sheehan N, Thompson J, Minelli C, Davey Smith  
562 G. Improving the visualization, interpretation and analysis of two-sample summary data  
563 Mendelian randomization via the Radial plot and Radial regression. Int J Epidemiol  
564 2018;47(4):1264-78. doi: 10.1093/ije/dyy101.
- 565 44. Hemani G, Zheng J, Elsworth B, Wade KH, Haberland V, Baird D, Laurin C, Burgess S,  
566 Bowden J, Langdon R, et al. The MR-Base platform supports systematic causal inference across  
567 the human phenome. Elife 2018;7. doi: 10.7554/eLife.34408.

- 568 45. Doaei S, Gholami S, Rastgoo S, Gholamalizadeh M, Bourbour F, Bagheri SE, Samipoor  
569 F, Akbari ME, Shadnoush M, Ghorat F, et al. The effect of omega-3 fatty acid supplementation  
570 on clinical and biochemical parameters of critically ill patients with COVID-19: a randomized  
571 clinical trial. *J Transl Med* 2021;19(1):128. doi: 10.1186/s12967-021-02795-5.
- 572 46. Chiang N, Serhan CN. Specialized pro-resolving mediator network: an update on  
573 production and actions. *Essays Biochem* 2020;64(3):443-62. doi: 10.1042/EBC20200018.
- 574 47. Das UN. Can Bioactive Lipid Arachidonic Acid Prevent and Ameliorate COVID-19?  
575 *Medicina (Kaunas)* 2020;56(9). doi: 10.3390/medicina56090418.
- 576 48. Yan B, Chu H, Yang D, Sze KH, Lai PM, Yuan S, Shuai H, Wang Y, Kao RY, Chan JF,  
577 et al. Characterization of the Lipidomic Profile of Human Coronavirus-Infected Cells:  
578 Implications for Lipid Metabolism Remodeling upon Coronavirus Replication. *Viruses*  
579 2019;11(1). doi: 10.3390/v11010073.
- 580 49. Toelzer C, Gupta K, Yadav SKN, Borucu U, Davidson AD, Kavanagh Williamson M,  
581 Shoemark DK, Garzoni F, Staufer O, Milligan R, et al. Free fatty acid binding pocket in the  
582 locked structure of SARS-CoV-2 spike protein. *Science* 2020;370(6517):725-30. doi:  
583 10.1126/science.abd3255.
- 584 50. Goc A, Niedzwiecki A, Rath M. Polyunsaturated omega-3 fatty acids inhibit ACE2-  
585 controlled SARS-CoV-2 binding and cellular entry. *Sci Rep* 2021;11(1):5207. doi:  
586 10.1038/s41598-021-84850-1.  
587

588 **Acknowledgments**

589 Our study was approved by the University of Georgia Institutional Review Board and the UK  
590 Biobank consortium (application no. 48818). We thank the investigators of the COVID-19 Host  
591 Genetics Initiative for sharing the GWAS summary statistics.

592  
593 The authors' responsibilities were as follows—YS and KY: designed the study, provided statistical  
594 advice, and interpreted the data; YS: performed data analysis and prepared visualizations; YS, RC,  
595 and AR: provided material support during the study; YS: wrote the paper; KY: critically revised  
596 the paper; and all authors: read and approved the final manuscript and took responsibility for the  
597 integrity of the work as a whole. The authors report no conflicts of interest.

598

599 **Data availability**

600 The COVID-19 data (GWAS summary statistics) used in this study are freely accessible in the  
601 COVID-19 Host Genetics Initiative (<https://www.covid19hg.org/>). The code for the analyses is  
602 available at [https://github.com/yitangsun/COVID19\\_PUFA\\_MR](https://github.com/yitangsun/COVID19_PUFA_MR).

603

604 **Notes**

605 Research reported in this publication was supported by the University of Georgia Research  
606 Foundation and by the National Institute of General Medical Sciences of the National Institutes of  
607 Health under Award Number R35GM143060. The content is solely the responsibility of the  
608 authors and does not necessarily represent the official views of the National Institutes of Health or  
609 the University of Georgia.

610

611 Supplemental Tables 1–29 are available from the “Supplementary data” link in the online posting  
612 of the article and from the same link in the online table of contents at  
613 <https://academic.oup.com/ajcn/>.

614  
615 Abbreviations used: COVID-19, coronavirus disease 2019; SARS-CoV-2, severe acute respiratory  
616 syndrome coronavirus 2; PUFAs, polyunsaturated fatty acids; LA: linoleic acid; EPA,  
617 eicosapentaenoic acid; DHA, docosahexaenoic acid; RBC, red blood cell; AA, arachidonic acid;  
618 MR, Mendelian randomization; BMI, body mass index; GWAS, genome-wide association studies;  
619 HGI, COVID-19 Host Genetics Initiative; FHS, Framingham Heart Study; STROBE,  
620 strengthening the reporting of observational studies in epidemiology; STROBE-MR, strengthening  
621 the reporting of Mendelian randomization studies; ALA,  $\alpha$ -Linolenic acid; DPA-n3,  
622 docosapentaenoic acid; GLA,  $\gamma$ -Linoleic acid; DGLA, dihomo- $\gamma$ -linoleic acid; DTA,  
623 docosatetraenoic acid; NMR, nuclear magnetic resonance; SD, standard deviation; SNPs, single  
624 nucleotide polymorphisms; LD, linkage disequilibrium; OR, odds ratio; IVW, inverse variance-  
625 weighted; WM, weighted median; CI, confidence interval; PGs, prostaglandins; HCoV-229E,  
626 human coronavirus 229E; MERS-CoV, Middle East respiratory syndrome coronavirus.

## Tables

**TABLE 1** Characteristics of the UK Biobank participants at baseline<sup>1</sup>

| Characteristics                                     | England                  |                              |               |               | England, Scotland, and Wales |               |
|-----------------------------------------------------|--------------------------|------------------------------|---------------|---------------|------------------------------|---------------|
|                                                     | Hospitalized<br>COVID-19 | Non-hospitalized<br>COVID-19 | Test positive | Test negative | Test positive                | Test negative |
| Participants, <i>n</i>                              | 4,209                    | 12,240                       | 16,449        | 76,307        | 17,395                       | 86,717        |
| Participants with plasma PUFA<br>measures, <i>n</i> | 970                      | 2,903                        | 3,873         | 18,293        | 4,101                        | 20,626        |
| Age, y                                              | 59 [40-70]               | 51 [40-70]                   | 52 [40-70]    | 59 [40-70]    | 52 [40-70]                   | 59 [40-70]    |
| Females, <i>n</i> (%)                               | 445 (46)                 | 1,559 (54)                   | 2,004 (52)    | 9,771 (53)    | 2,123 (52)                   | 11,145 (54)   |
| Body mass index, kg/m <sup>2</sup> (SD)             | 29.55 (5.61)             | 27.96 (4.94)                 | 28.36 (5.16)  | 27.69 (4.88)  | 28.36 (5.14)                 | 27.71 (4.89)  |
| PUFAs, mmol/l (SD)                                  | 4.82 (0.81)              | 4.92 (0.78)                  | 4.89 (0.79)   | 4.97 (0.804)  | 4.89 (0.78)                  | 4.96 (0.801)  |
| Omega-3 PUFAs, mmol/l (SD)                          | 0.48 (0.203)             | 0.49 (0.205)                 | 0.49 (0.204)  | 0.53 (0.22)   | 0.49 (0.203)                 | 0.53 (0.22)   |
| DHA, mmol/l (SD)                                    | 0.21 (0.07)              | 0.22 (0.08)                  | 0.22 (0.08)   | 0.24 (0.08)   | 0.22 (0.08)                  | 0.23 (0.08)   |
| Omega-6 PUFAs, mmol/l (SD)                          | 4.34 (0.699)             | 4.42 (0.66)                  | 4.401 (0.67)  | 4.44 (0.68)   | 4.402 (0.67)                 | 4.44 (0.68)   |
| LA, mmol/l (SD)                                     | 3.29 (0.698)             | 3.39 (0.65)                  | 3.37 (0.67)   | 3.39 (0.69)   | 3.37 (0.66)                  | 3.39 (0.68)   |

<sup>1</sup> Values are numbers (%) for categorical variables, mean (SD) or medians [range] for continuous variables. PUFAs, polyunsaturated fatty acids; DHA, docosahexaenoic acid; LA linoleic acid.

**TABLE 2** Associations of PUFAs concentrations with COVID-19 susceptibility and severity<sup>1</sup>

|                      | COVID-19 severity                                     |       |                      |                                                     |       |                      | COVID-19 susceptibility                                           |       |                      |                                                                   |       |                      |
|----------------------|-------------------------------------------------------|-------|----------------------|-----------------------------------------------------|-------|----------------------|-------------------------------------------------------------------|-------|----------------------|-------------------------------------------------------------------|-------|----------------------|
|                      | Hospitalized vs. Non-hospitalized ( <i>n</i> = 3,873) |       |                      | Hospitalized vs. Test negative ( <i>n</i> = 19,263) |       |                      | Test positive vs. Test negative ( <i>n</i> = 22,166) <sup>2</sup> |       |                      | Test positive vs. Test negative ( <i>n</i> = 24,727) <sup>3</sup> |       |                      |
| Plasma PUFA measures | $\beta$                                               | SE    | <i>P</i>             | $\beta$                                             | SE    | <i>P</i>             | $\beta$                                                           | SE    | <i>P</i>             | $\beta$                                                           | SE    | <i>P</i>             |
| PUFAs                | -0.139                                                | 0.043 | 0.0012               | -0.127                                              | 0.037 | 0.0005               | -0.029                                                            | 0.019 | 0.1285               | -0.027                                                            | 0.018 | 0.1337               |
| Omega-3 PUFAs        | -0.140                                                | 0.044 | 0.0013               | -0.197                                              | 0.040 | $8.1 \times 10^{-7}$ | -0.083                                                            | 0.020 | $4.3 \times 10^{-5}$ | -0.082                                                            | 0.019 | $2.3 \times 10^{-5}$ |
| DHA                  | -0.176                                                | 0.045 | $8.9 \times 10^{-5}$ | -0.247                                              | 0.042 | $4.6 \times 10^{-9}$ | -0.098                                                            | 0.021 | $3.0 \times 10^{-6}$ | -0.097                                                            | 0.020 | $1.4 \times 10^{-6}$ |
| Omega-6 PUFAs        | -0.121                                                | 0.043 | 0.0047               | -0.090                                              | 0.036 | 0.0121               | -0.010                                                            | 0.019 | 0.6183               | -0.008                                                            | 0.018 | 0.6656               |
| LA                   | -0.113                                                | 0.043 | 0.0079               | -0.082                                              | 0.036 | 0.0228               | -0.007                                                            | 0.019 | 0.7289               | -0.006                                                            | 0.018 | 0.7299               |
| Omega-6/omega-3      | 0.114                                                 | 0.042 | 0.0061               | 0.124                                               | 0.029 | $1.5 \times 10^{-5}$ | 0.053                                                             | 0.018 | 0.0030               | 0.058                                                             | 0.017 | 0.0005               |

1 Effect sizes ( $\beta$ ) per SD increase in the exposure, SEs, and *P* values were obtained from the logistic regression analysis of COVID-19 susceptibility and severity. All models were adjusted for age, sex, ethnicity, BMI, Townsend deprivation index, and assessment center. PUFA, polyunsaturated fatty acids; DHA, docosahexaenoic acid; LA linoleic acid.

2 Data from England only.

3 Data from England, Scotland, and Wales.

## Figure Legends

**Figure 1. Flowchart of the UK Biobank participants from recruitment to inclusion in the observational analysis.**

**Figure 2. Mendelian randomization estimates of the effects of polyunsaturated fatty acids on COVID-19 severity risk. (A) Mendelian randomization analysis based on the release 5 HGI A2. (B) Mendelian randomization analysis based on the release 5 HGI B2. (C) Mendelian randomization analysis based on the release 5 HGI B1.** Odds ratios are scaled to a genetically predicted SD increase in polyunsaturated fatty acids. Associations with  $p$ -value  $< 0.05$  were indicated with diamonds, while others with squares. Detailed summary statistics are available in Supplemental Tables 6–8. PUFA, polyunsaturated fatty acid; ALA,  $\alpha$ -Linolenic acid; LA: linoleic acid; GLA,  $\gamma$ -Linoleic acid; DGLA, dihomo- $\gamma$ -linoleic acid; AA, arachidonic acid; DPA-n3, docosapentaenoic acid; DTA, docosatetraenoic acid; DHA, docosahexaenoic acid; OR, odds ratio.

**Figure 3. Mendelian randomization estimates of the effects of polyunsaturated fatty acids on COVID-19 susceptibility risk based on the release 5 HGI C2.** Odds ratios are scaled to a genetically predicted SD increase in polyunsaturated fatty acids. Associations with  $p$ -value  $< 0.05$  were indicated with diamonds, while others with squares. Detailed summary statistics are available in Supplemental Table 9. PUFA, polyunsaturated fatty acid; ALA,  $\alpha$ -Linolenic acid; LA: linoleic acid; GLA,  $\gamma$ -Linoleic acid; DGLA, dihomo- $\gamma$ -linoleic acid; AA, arachidonic acid; DPA-n3, docosapentaenoic acid; DTA, docosatetraenoic acid; DHA, docosahexaenoic acid; OR, odds ratio.

## Figures

FIGURE 1

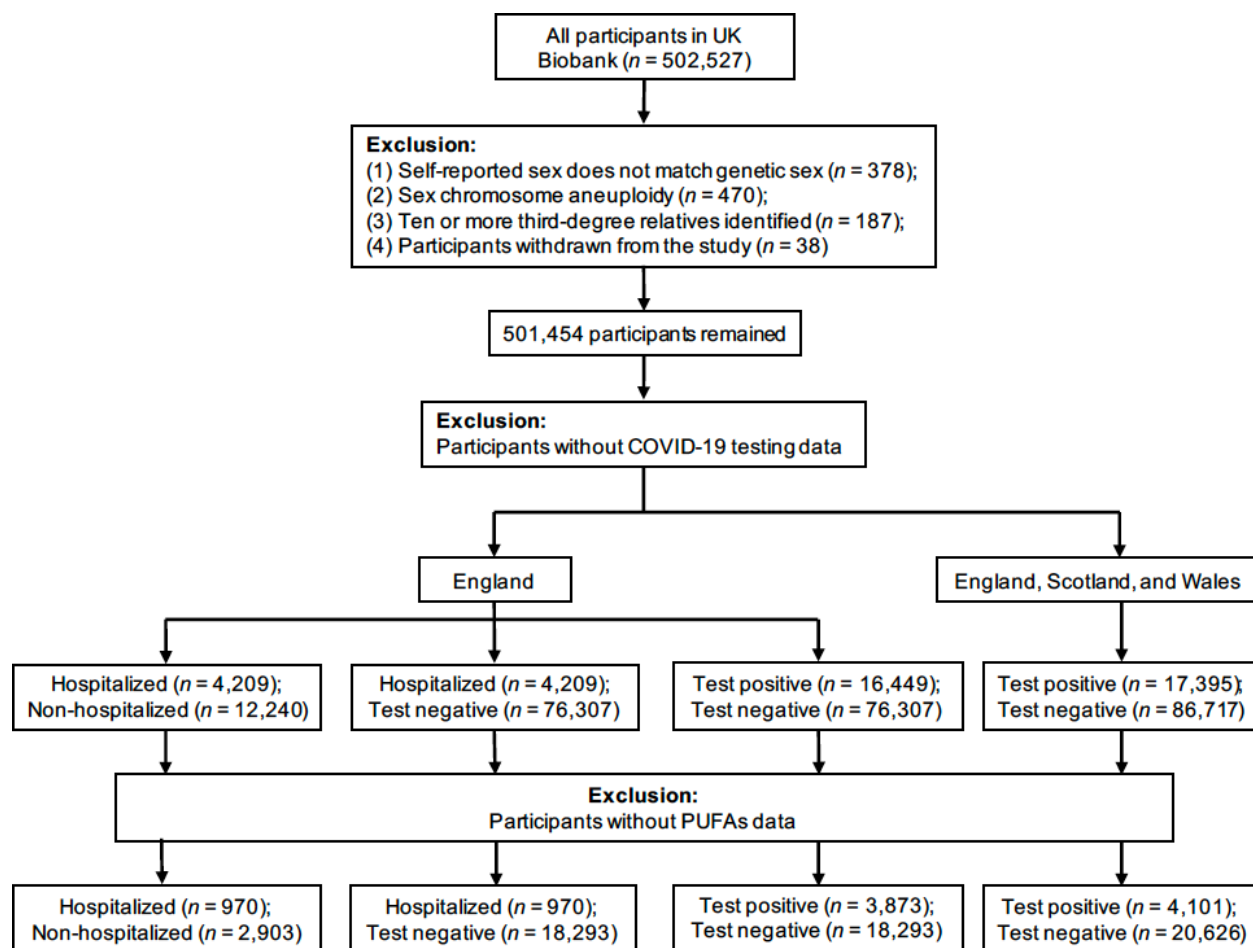



FIGURE 2

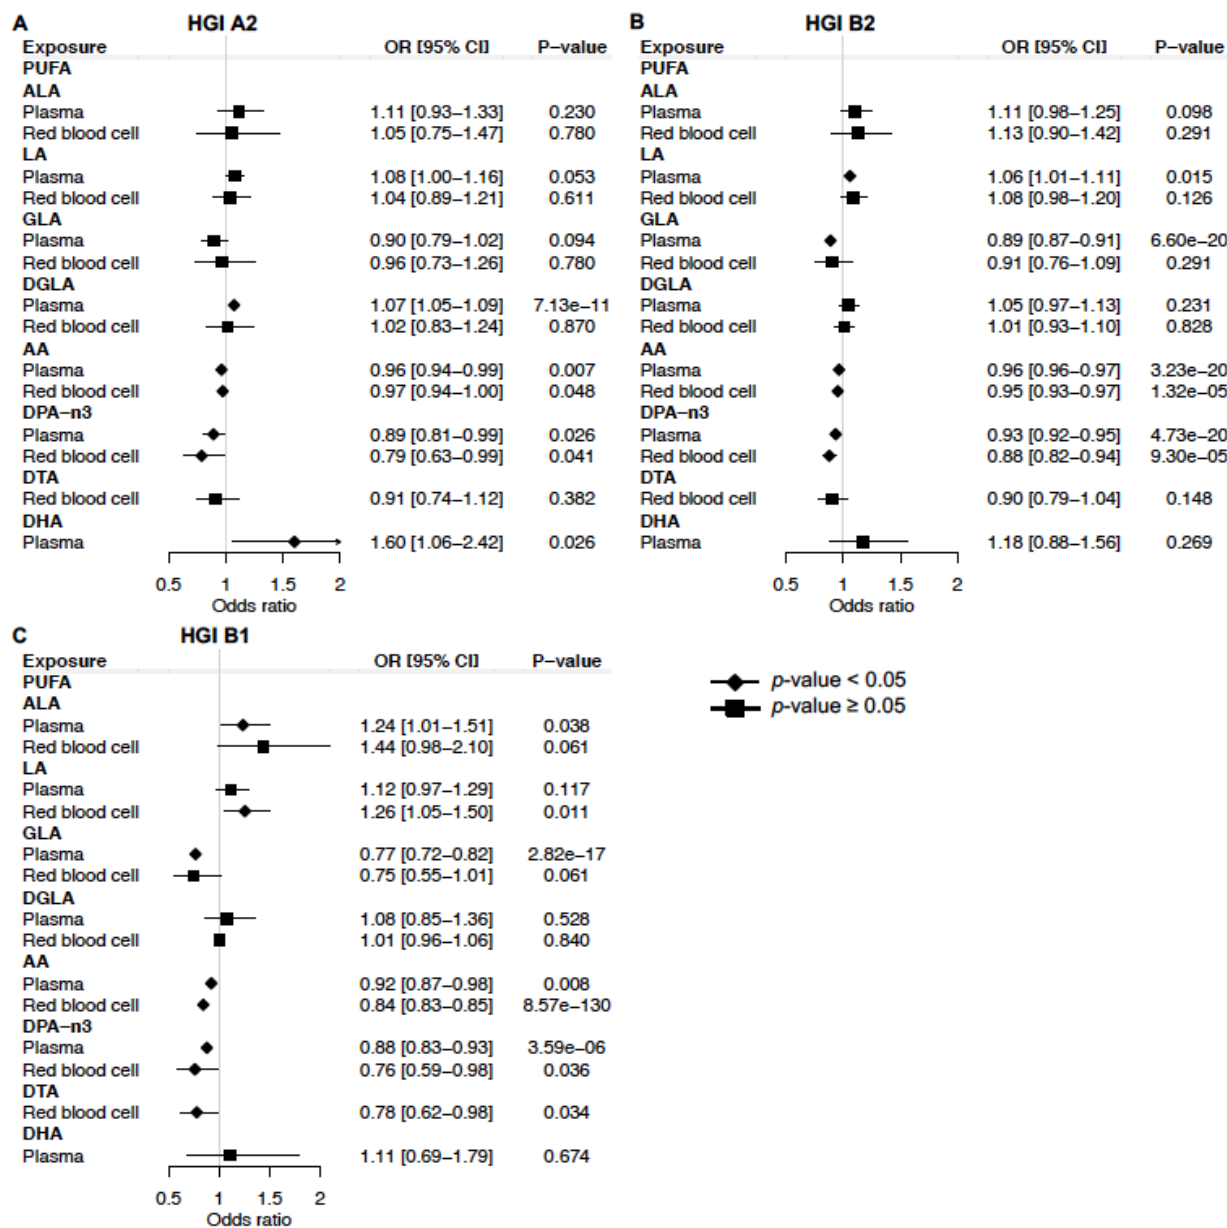

FIGURE 3

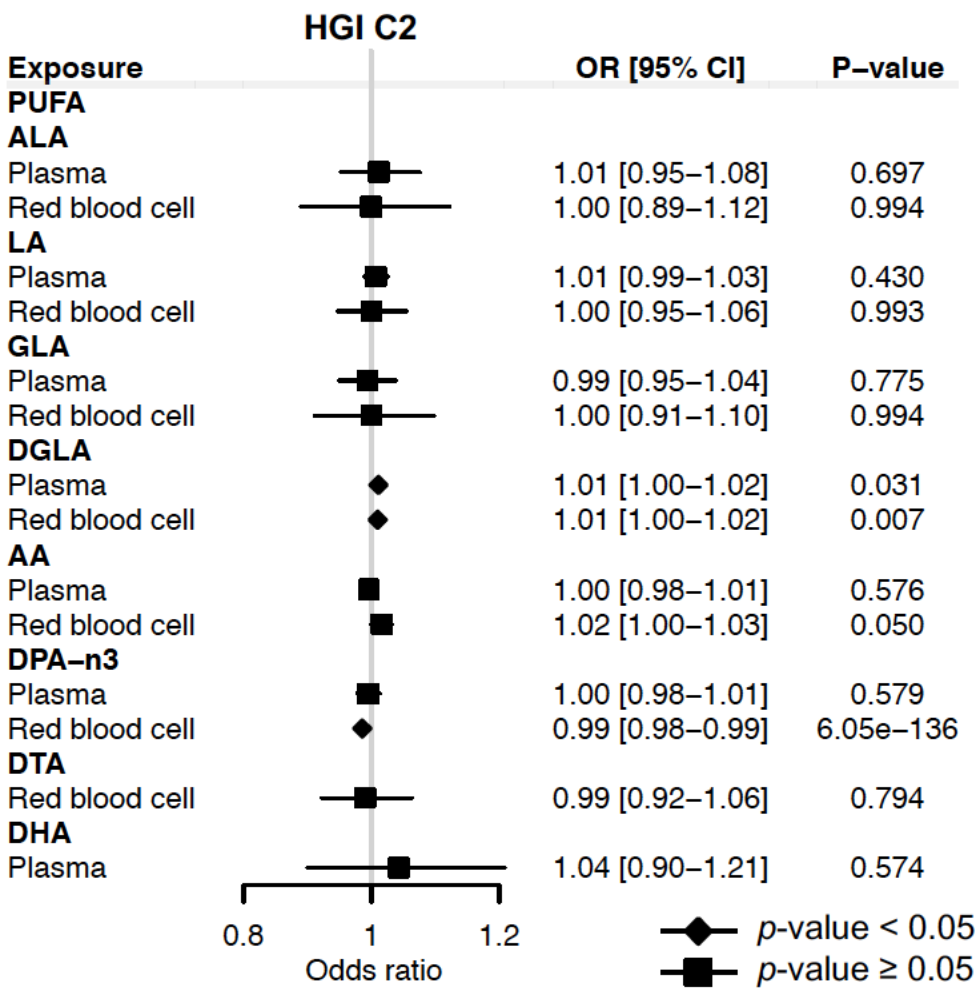

## Supplemental Tables

Supplemental Table 1. Notable Mendelian randomization studies of polyunsaturated fatty acids.

Supplemental Table 2. STROBE Statement—checklist of items that should be included in reports of cohort studies.

Supplemental Table 3. STROBE-MR checklist.

Supplemental Table 4. Genetic instruments for plasma polyunsaturated fatty acids.

Supplemental Table 5. Significant SNPs for red blood cell polyunsaturated fatty acids.

Supplemental Table 6. Forward Mendelian randomization estimates of associations of genetically predicted polyunsaturated fatty acids with COVID-19 severity based on the release 5 HGI A2.

Supplemental Table 7. Forward Mendelian randomization estimates of associations of genetically predicted polyunsaturated fatty acids with COVID-19 severity based on the release 5 HGI B2.

Supplemental Table 8. Forward Mendelian randomization estimates of associations of genetically predicted polyunsaturated fatty acids with COVID-19 severity based on the release 5 HGI B1.

Supplemental Table 9. Forward Mendelian randomization estimates of associations of genetically predicted polyunsaturated fatty acids with COVID-19 susceptibility based on the release 5 HGI C2.

Supplemental Table 10. Forward Mendelian randomization estimates of associations of genetically predicted polyunsaturated fatty acids with COVID-19 severity based on the release 4 HGI A2.

Supplemental Table 11. Forward Mendelian randomization estimates of associations of genetically predicted polyunsaturated fatty acids with COVID-19 severity based on the release 4 HGI B2.

Supplemental Table 12. Forward Mendelian randomization estimates of associations of genetically predicted polyunsaturated fatty acids with COVID-19 severity based on the release 4 HGI B1.

Supplemental Table 13. Forward Mendelian randomization estimates of associations of genetically predicted polyunsaturated fatty acids with COVID-19 susceptibility based on the release 4 HGI C2.

Supplemental Table 14. Reverse Mendelian randomization estimates of associations of genetically predicted COVID-19 severity with polyunsaturated fatty acids based on the release 5 HGI A2 (COVID-19 SNP  $P < 5e-8$ ).

Supplemental Table 15. Reverse Mendelian randomization estimates of associations of genetically predicted COVID-19 severity with polyunsaturated fatty acids based on the release 5 HGI B2 (COVID-19 SNP  $P < 5e-8$ ).

Supplemental Table 16. Reverse Mendelian randomization estimates of associations of genetically predicted COVID-19 severity with polyunsaturated fatty acids based on the release 5 HGI B1 (COVID-19 SNP  $P < 5e-8$ ).

Supplemental Table 17. Reverse Mendelian randomization estimates of associations of genetically predicted COVID-19 susceptibility with polyunsaturated fatty acids based on the release 5 HGI C2 (COVID-19 SNP  $P < 5e-8$ ).

Supplemental Table 18. Reverse Mendelian randomization estimates of associations of genetically predicted COVID-19 severity with polyunsaturated fatty acids based on the release 5 HGI A2 (COVID-19 SNP  $P < 5e-6$ ).

Supplemental Table 19. Reverse Mendelian randomization estimates of associations of genetically predicted COVID-19 severity with polyunsaturated fatty acids based on the release 5 HGI B2 (COVID-19 SNP  $P < 5e-6$ ).

Supplemental Table 20. Reverse Mendelian randomization estimates of associations of genetically predicted COVID-19 severity with polyunsaturated fatty acids based on the release 5 HGI B1 (COVID-19 SNP  $P < 5e-6$ ).

Supplemental Table 21. Reverse Mendelian randomization estimates of associations of genetically predicted COVID-19 susceptibility with polyunsaturated fatty acids based on the release 5 HGI C2 (COVID-19 SNP  $P < 5e-6$ ).

Supplemental Table 22. Reverse Mendelian randomization estimates of associations of genetically predicted COVID-19 severity with polyunsaturated fatty acids based on the release 4 HGI A2 (COVID-19 SNP  $P < 5e-8$ ).

Supplemental Table 23. Reverse Mendelian randomization estimates of associations of genetically predicted COVID-19 severity with polyunsaturated fatty acids based on the release 4 HGI B2 (COVID-19 SNP  $P < 5e-8$ ).

Supplemental Table 24. Reverse Mendelian randomization estimates of associations of genetically predicted COVID-19 severity with polyunsaturated fatty acids based on the release 4 HGI B1 (COVID-19 SNP  $P < 5e-8$ ).

Supplemental Table 25. Reverse Mendelian randomization estimates of associations of genetically predicted COVID-19 susceptibility with polyunsaturated fatty acids based on the release 4 HGI C2 (COVID-19 SNP  $P < 5e-8$ ).

Supplemental Table 26. Reverse Mendelian randomization estimates of associations of genetically predicted COVID-19 severity with polyunsaturated fatty acids based on the release 4 HGI A2 (COVID-19 SNP  $P < 5e-6$ ).

Supplemental Table 27. Reverse Mendelian randomization estimates of associations of genetically predicted COVID-19 severity with polyunsaturated fatty acids based on the release 4 HGI B2 (COVID-19 SNP  $P < 5e-6$ ).

Supplemental Table 28. Reverse Mendelian randomization estimates of associations of genetically predicted COVID-19 severity with polyunsaturated fatty acids based on the release 4 HGI B1 (COVID-19 SNP  $P < 5e-6$ ).

Supplemental Table 29. Reverse Mendelian randomization estimates of associations of genetically predicted COVID-19 susceptibility with polyunsaturated fatty acids based on the release 4 HGI C2 (COVID-19 SNP  $P < 5e-6$ ).
